# Supplementary material
Source: Springer Nature journal article supplement (https://www.springermedizin.de/resource/supplementary/12883_2013_962_MOESM2_ESM.pdf/9456522)

Male

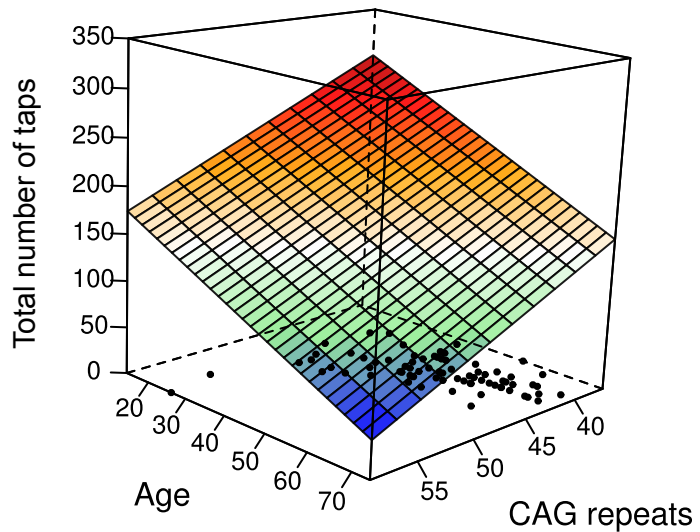

Female

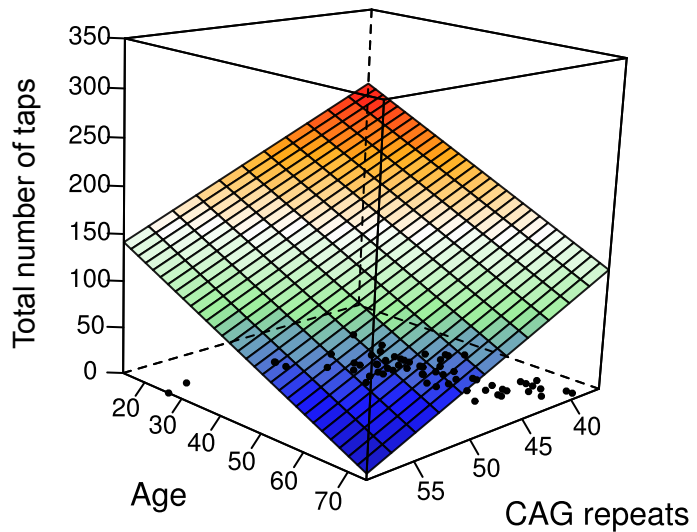

Supplement: MOESM2 [file 9456522]
